# Supplementary material for: SIRT1, 2, 3 protect mouse oocytes from postovulatory aging
Source: PubMed Central journal article supplement (PMC4925822; doi:10.18632/aging.100911), 2016-03-10
Supplement: aging-08-685-s001.pdf [file aging-08-685-s001.pdf]

SUPPLEMENTARY FIGURES

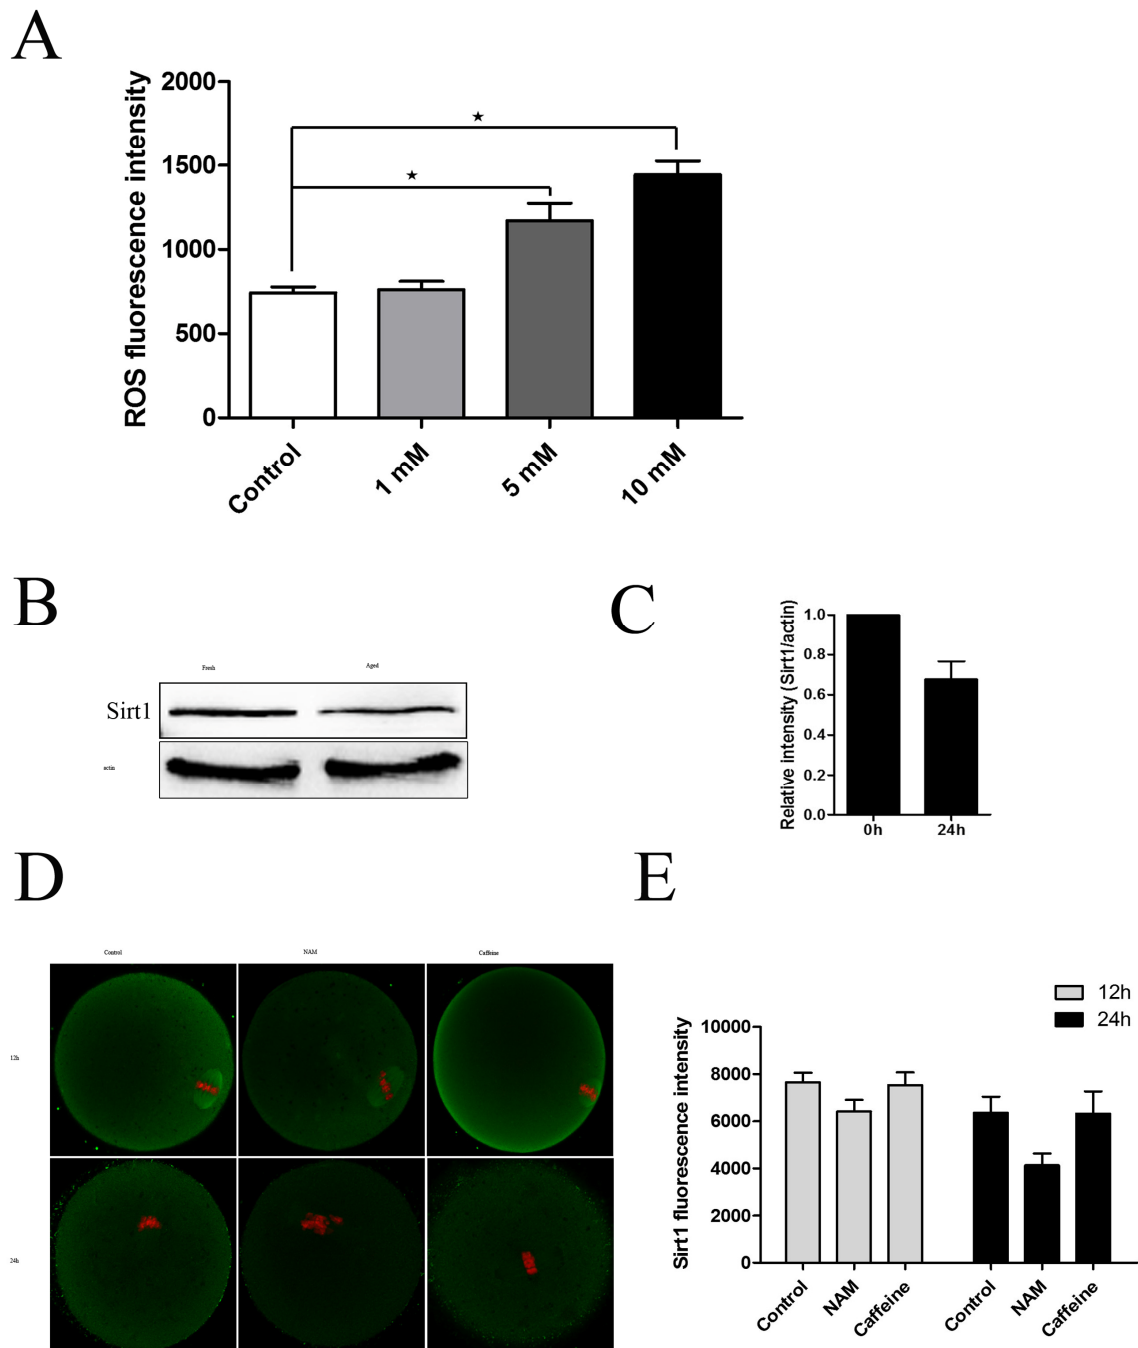

**Figure S1.** (A) Analysis of fluorescence intensity at 6 h of oocyte aging in vitro after 0, 1, 5, or 10 mM NAM treatment. (B) The expression of SIRT1 protein in fresh MII oocytes and at 24 h of MII oocyte aging in vitro. (C) Quantitative analysis of gray intensity was conducted. (D) The sub-cellular localization of SIRT1 after NAM or Caffeine treatment in mouse MII oocytes. (E) Quantitative analysis of fluorescence intensity. \*Significantly different (P < 0.05).

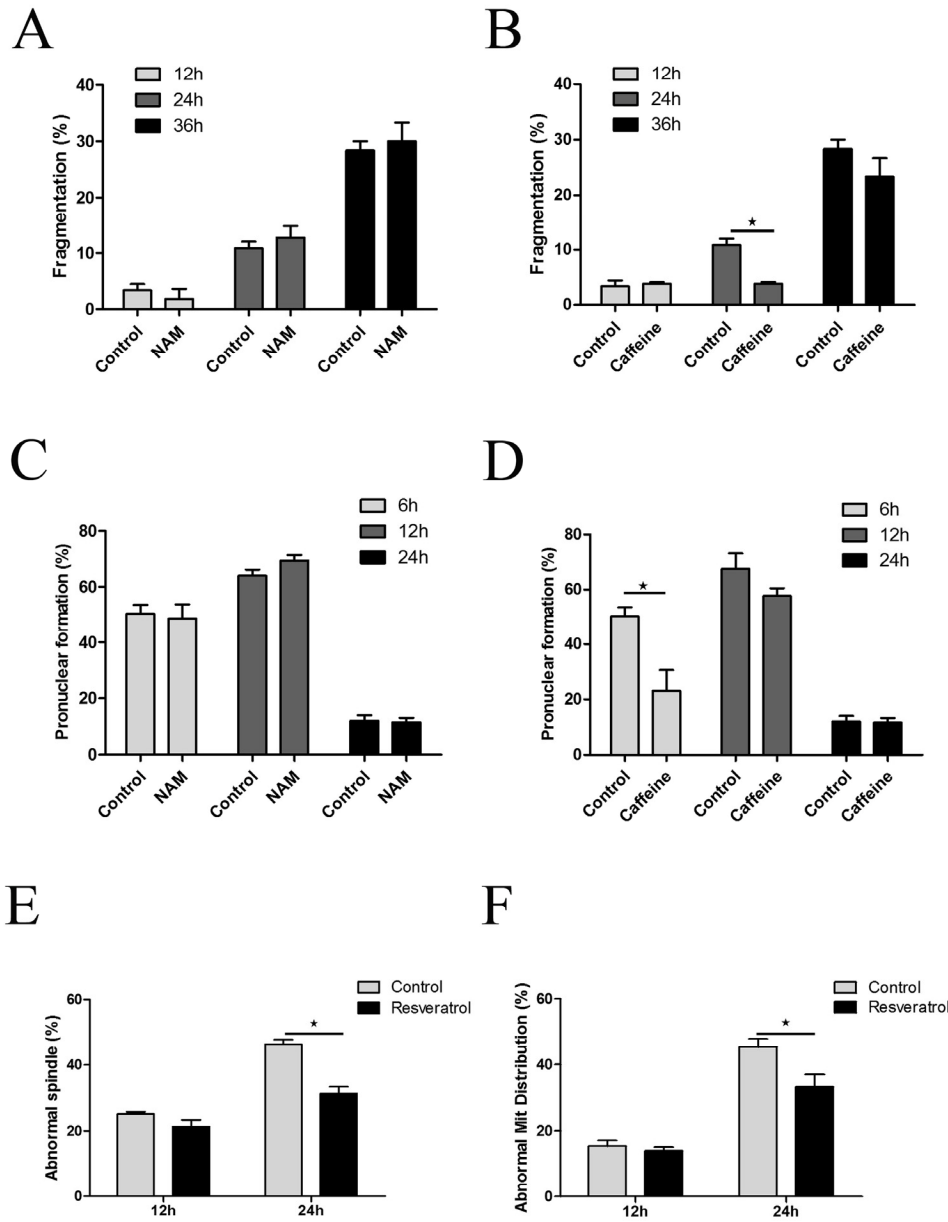

**Figure S2.** (A and B) The proportion of oocytes fragmentation in control; NAM-treated and caffeine-treated oocytes at 12 h, 24h and 36h of MII oocyte aging. (C and D) The proportion of pronuclear formation in control; NAM-treated and caffeine-treated oocytes at 6 h, 14h and 24h of MII oocyte aging. (E) Percentages of abnormal spindles in control or resveratrol-treated oocytes at 12h and 24h after aging. (F) Percentages of abnormal mitochondrial morphology in control and resveratrol-treated oocytes at 12h and 24h after aging. \*Significantly different ( $P < 0.05$ ).
